# Supplementary material for: Development and Validation of a Deep Learning System for Segmentation of Abdominal Muscle and Fat on Computed Tomography
Source: PubMed Central journal article supplement — Korean J Radiol. 2019 Dec 16;21(1):88–100. doi: 10.3348/kjr.2019.0470 (PMC6960305; doi:10.3348/kjr.2019.0470), 2019-12-16
Supplement: kjr-21-88-s001.pdf [file kjr-21-88-s001.pdf]

**Supplementary Table 1. CT Manufactures Distribution in Training and Validation Datasets**

| CT Vendors | Training Dataset | Internal Validation Set | External Validation Set |
|------------|------------------|-------------------------|-------------------------|
| Siemens    | 591 (66.9)       | 311 (73.0)              | 72 (42.1)               |
| GE         | 246 (27.9)       | 115 (27.0)              | 0 (0.0)                 |
| Philips    | 12 (1.3)         | 0 (0.0)                 | 99 (57.9)               |
| Other*     | 34 (3.9)         | 0 (0.0)                 | 0 (0.0)                 |
| Sum        | 883 (100.0)      | 426 (100.0)             | 171 (100.0)             |

Data are number of CT scans with percentage in parenthesis. \*Included Toshiba and Hitachi Systems.
