# Supplementary material for: Development and Validation of a Deep Learning System for Segmentation of Abdominal Muscle and Fat on Computed Tomography
Source: PubMed Central journal article supplement — Korean J Radiol. 2019 Dec 16;21(1):88–100. doi: 10.3348/kjr.2019.0470 (PMC6960305; doi:10.3348/kjr.2019.0470), 2019-12-16
Supplement: kjr-21-88-s002.pdf [file kjr-21-88-s002.pdf]

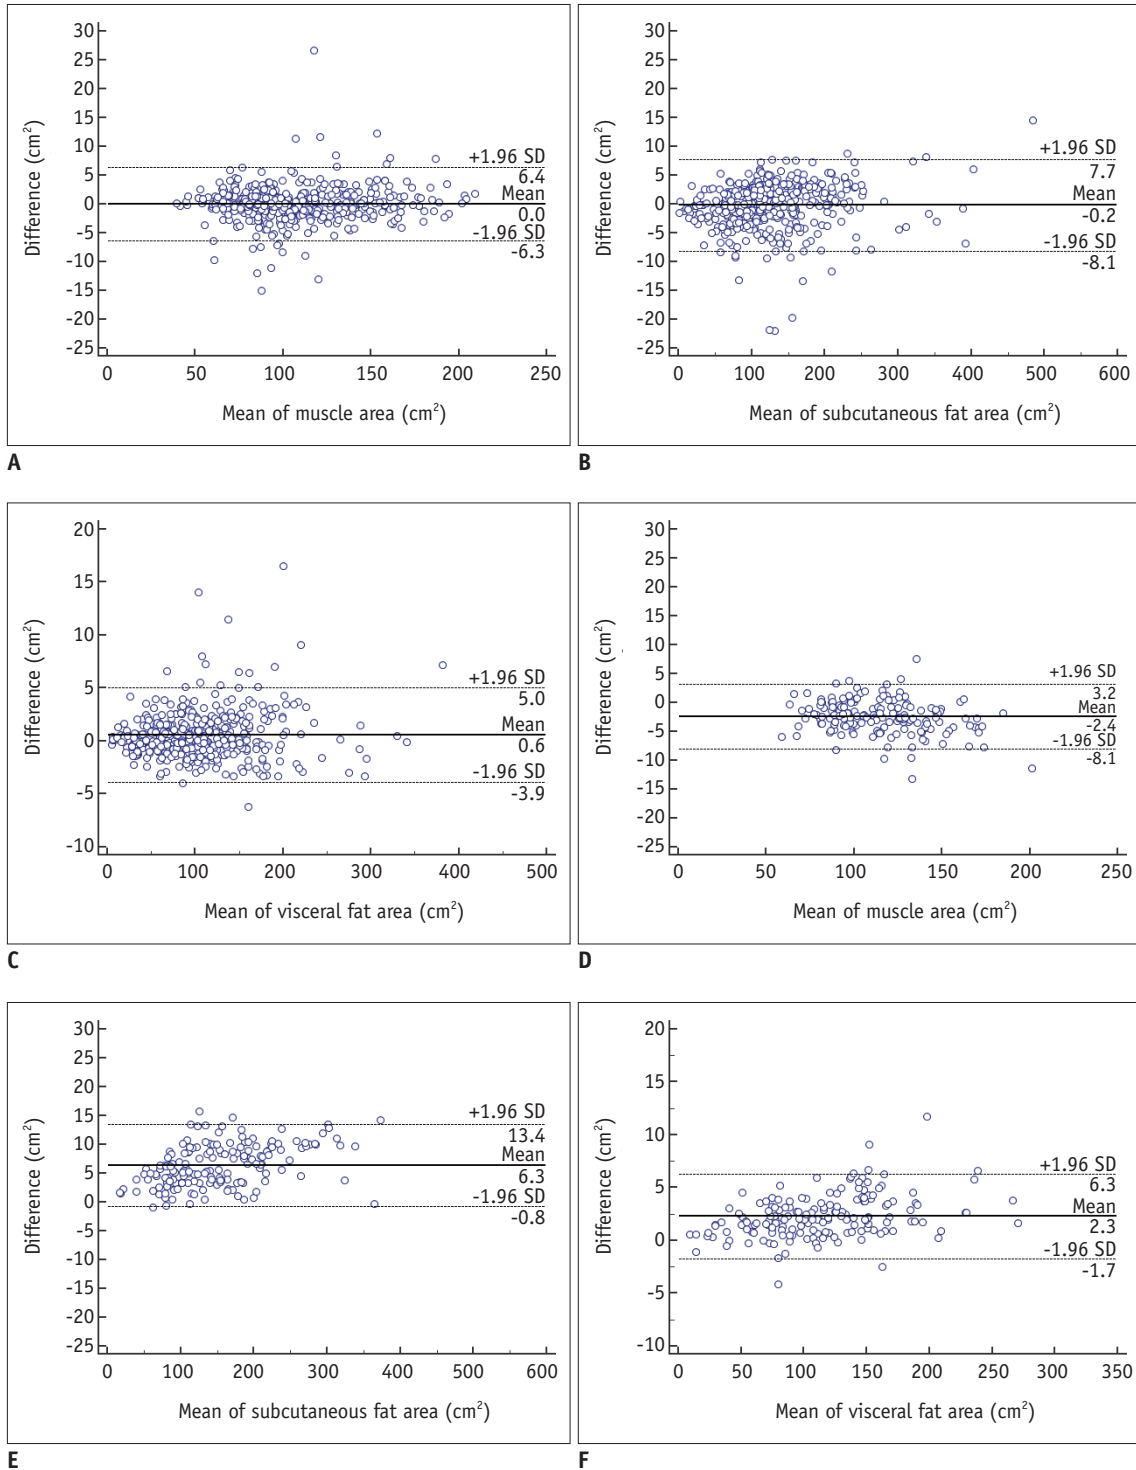

**Supplementary Fig. 1. Bland-Altman plots of muscle (A, D), subcutaneous fat (B, E), and visceral fat (C, F) for each validation dataset.** Bland-Altman plots of muscle (A), subcutaneous fat (B), and visceral fat (C) for internal validation dataset. Mean differences were equal to or less than 0.6 cm<sup>2</sup>, with 95% limits of agreement equal to or less than 7.9 cm<sup>2</sup>. Bland-Altman plots of muscle (D), subcutaneous fat (E), and visceral fat (F) for external validation dataset. Mean differences were equal to or less than 6.3 cm<sup>2</sup>, with 95% limits of agreement equal to or less than 7.1 cm<sup>2</sup>. SD = standard deviation
