# Supplementary material for: Development and Validation of a Deep Learning System for Segmentation of Abdominal Muscle and Fat on Computed Tomography
Source: PubMed Central journal article supplement — Korean J Radiol. 2019 Dec 16;21(1):88–100. doi: 10.3348/kjr.2019.0470 (PMC6960305; doi:10.3348/kjr.2019.0470), 2019-12-16
Supplement: kjr-21-88-s003.pdf [file kjr-21-88-s003.pdf]

**Supplementary Table 2. Quantitative Results of FCN-Based Segmentation according to Visual Assessment**

| Visual Assessment                    | Ground Truth (cm <sup>2</sup> )  |                                  |                                 | FCN-Based Segmentation (cm <sup>2</sup> ) |                                  |                                 | DSC                        |                            |                            | CSA Error (%)                 |                                |                             |
|--------------------------------------|----------------------------------|----------------------------------|---------------------------------|-------------------------------------------|----------------------------------|---------------------------------|----------------------------|----------------------------|----------------------------|-------------------------------|--------------------------------|-----------------------------|
|                                      | MA                               | SFA                              | VFA                             | MA                                        | SFA                              | VFA                             | MA                         | SFA                        | VFA                        | MA                            | SFA                            | VFA                         |
| Requiring manual adjustment (n = 23) | 96.66 ± 30.48<br>(39.16–138.51)  | 127.06 ± 129.86<br>(0.48–490.87) | 69.29 ± 49.58<br>(5.99–163.26)  | 95.87 ± 29.20<br>(39.07–138.40)           | 126.31 ± 127.57<br>(1.59–476.38) | 68.65 ± 48.96<br>(5.85–159.36)  | 0.92 ± 0.05<br>(0.79–0.97) | 0.91 ± 0.14<br>(0.34–0.98) | 0.97 ± 0.01<br>(0.92–0.99) | 3.89 ± 4.97<br>(0.08–20.36)   | 19.86 ± 67.09<br>(0.27–326.36) | 2.71 ± 1.76<br>(0.49–6.52)  |
| Successful (n = 574)                 | 109.95 ± 31.83<br>(40.99–210.08) | 134.56 ± 66.42<br>(11.31–389.13) | 109.15 ± 56.01<br>(4.49–384.83) | 110.68 ± 31.93<br>(41.32–208.22)          | 132.86 ± 65.04<br>(12.26–395.92) | 108.07 ± 55.58<br>(4.83–377.67) | 0.97 ± 0.02<br>(0.75–0.99) | 0.97 ± 0.02<br>(0.79–0.99) | 0.97 ± 0.01<br>(0.90–0.99) | 2.19 ± 2.23<br>(< 0.01–18.78) | 3.39 ± 3.03<br>(0.03–23.30)    | 1.89 ± 1.79<br>(0.01–14.84) |

Data are presented as mean ± standard deviation, with range in parenthesis. 'n' indicates number of CT scans. CSA = cross-sectional area, DSC = Dice similarity coefficient, FCN = fully convolutional network, MA = muscle area, SFA = subcutaneous fat area, VFA = visceral fat area
