# Supplementary material for: Development and Validation of a Deep Learning System for Segmentation of Abdominal Muscle and Fat on Computed Tomography
Source: PubMed Central journal article supplement — Korean J Radiol. 2019 Dec 16;21(1):88–100. doi: 10.3348/kjr.2019.0470 (PMC6960305; doi:10.3348/kjr.2019.0470), 2019-12-16
Supplement: kjr-21-88-s004.pdf [file kjr-21-88-s004.pdf]

**Supplementary Table 3. Subgroup Analyses of Segmentation Results from Ground Truth and FCN-Based Segmentation**

| Influential Factors  | Subgroups                  | Ground Truth (cm <sup>2</sup> ) |                                |                                | FCN-Based Segmentation (cm <sup>2</sup> ) |                                |                                |
|----------------------|----------------------------|---------------------------------|--------------------------------|--------------------------------|-------------------------------------------|--------------------------------|--------------------------------|
|                      |                            | MA                              | SFA                            | VFA                            | MA                                        | SFA                            | VFA                            |
| Contrast enhancement | Used (n = 277)             | 112.0 ± 29.9<br>(52.5, 201.5)   | 124.9 ± 63.7<br>(6.0, 124.9)   | 103.0 ± 57.3<br>(4.5, 293.6)   | 113.5 ± 30.3<br>(51.6, 206.9)             | 123.6 ± 63.5<br>(7.2, 399.9)   | 102.0 ± 57.1<br>(4.8, 295.2)   |
|                      | Not used (n = 320)         | 107.2 ± 33.3<br>(39.2, 210.1)   | 142.4 ± 73.7<br>(0.5, 490.9)   | 111.6 ± 55.1<br>(6.0, 384.8)   | 107.3 ± 33.0<br>(39.1, 208.2)             | 140.5 ± 110.5<br>(1.6, 476.4)  | 110.5 ± 54.5<br>(5.9, 377.7)   |
| Segmented area size  | Highest quartile (n = 149) | 153.2 ± 18.5<br>(130.2, 210.1)  | 228.6 ± 55.5<br>(171.8, 490.9) | 181.9 ± 42.5<br>(142.0, 384.8) | 153.4 ± 19.1<br>(104.3, 208.2)            | 224.5 ± 55.0<br>(161.8, 476.4) | 180.0 ± 42.8<br>(131.7, 377.7) |
|                      | Lowest quartile (n = 149)  | 73.0 ± 10.5<br>(39.2, 85.6)     | 58.5 ± 22.0<br>(0.5, 86.0)     | 43.3 ± 17.0<br>(4.5, 67.3)     | 73.6 ± 11.2<br>(39.1, 95.0)               | 59.0 ± 21.9<br>(1.6, 89.5)     | 42.9 ± 17.0<br>(4.8, 69.1)     |
| Disease type         | Gastric cancer (n = 193)   | 120.8 ± 30.2<br>(55.7, 201.5)   | 125.9 ± 53.0<br>(17.8, 325.5)  | 111.5 ± 60.4<br>(9.1, 293.6)   | 122.8 ± 30.4<br>(61.5, 206.9)             | 123.0 ± 52.9<br>(16.1, 321.8)  | 110.5 ± 60.4<br>(8.5, 295.2)   |
|                      | Sepsis (n = 234)           | 95.8 ± 26.9<br>(39.2, 172.5)    | 116.1 ± 71.2<br>(0.5, 490.9)   | 103.3 ± 55.6<br>(4.5, 384.9)   | 95.8 ± 26.2<br>(39.1, 168.5)              | 117.7 ± 70.8<br>(1.6, 476.4)   | 102.3 ± 55.0<br>(4.8, 377.7)   |
|                      | Healthy (n = 170)          | 115.3 ± 33.3<br>(63.1, 210.1)   | 168.7 ± 72.4<br>(17.9, 388.2)  | 109.1 ± 52.2<br>(22.0, 329.5)  | 115.6 ± 33.0<br>(62.0, 208.2)             | 164.1 ± 70.4<br>(19.5, 389.0)  | 108.0 ± 51.3<br>(22.6, 329.0)  |

Data are presented as mean ± standard deviation, with range in parenthesis. 'n' indicates number of CT scans.
