# Supplementary material for: Development and Validation of a Deep Learning System for Segmentation of Abdominal Muscle and Fat on Computed Tomography
Source: PubMed Central journal article supplement — Korean J Radiol. 2019 Dec 16;21(1):88–100. doi: 10.3348/kjr.2019.0470 (PMC6960305; doi:10.3348/kjr.2019.0470), 2019-12-16
Supplement: kjr-21-88-s005.pdf [file kjr-21-88-s005.pdf]

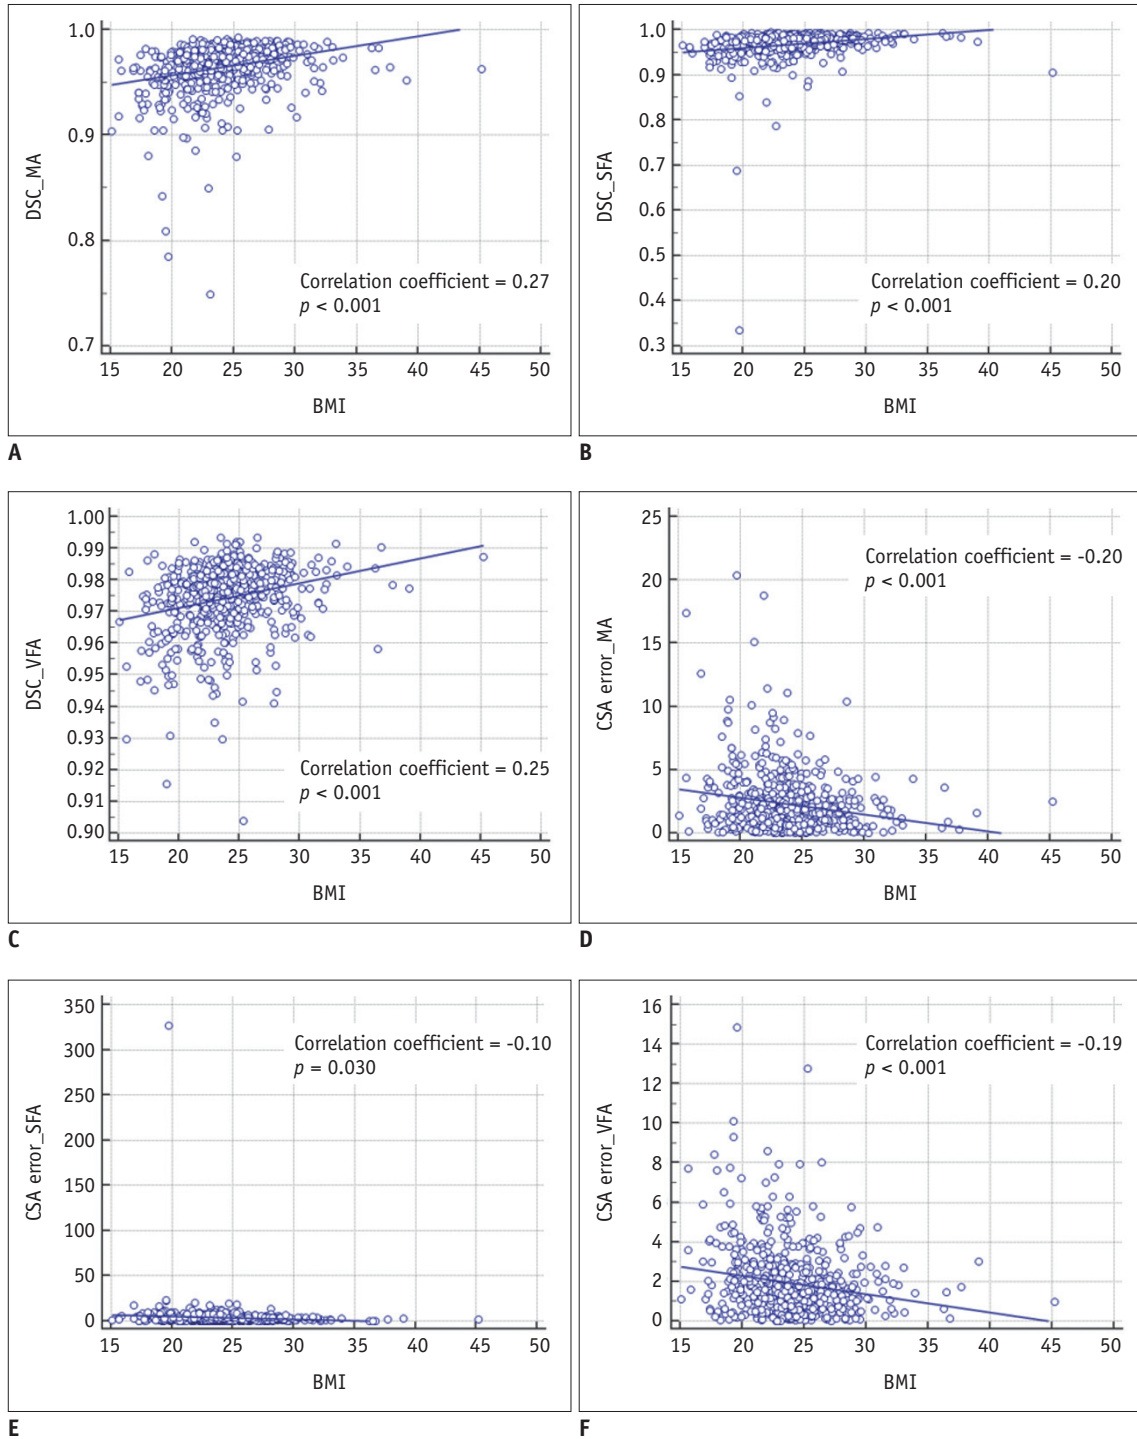

**Supplementary Fig. 2. Correlation of BMI and segmentation performance in internal and external validation datasets.** Scatter plots of BMI and DSC for muscle (A), subcutaneous fat (B), and visceral fat (C). Scatter plots of BMI and CSA error for muscle (D), subcutaneous fat (E), and visceral fat (F). BMI = body mass index, CSA error = cross-sectional area error, DSC = Dice similarity coefficient, MA = muscle area, SFA = subcutaneous fat area, VFA = visceral fat area
